# Supplementary material
Source: publisher figshare collection journal article supplement (https://karger.figshare.com/ndownloader/files/28911069)
Supplement: Supplementary file 1 [file 28911069]

Supplemental Table 1: Clinical features of CD patients showing a good response to each therapy.

|  | UST group  (n=12) | TNF group  (n=9) | p-value |
| --- | --- | --- | --- |
| Gender (M/F) | 7/5 | 6/3 | 1 |
| Age | 36 (17–74) | 40 (22–66) | 0.915 |
| Disease duration (m) | 21 (0–498) | 1 (1–268) | 0.142 |
| Location |  |  | 0.971 |
| L1 | 1 | 1 |  |
| L2 | 8 | 6 |  |
| L3 | 3 | 2 |  |
| Disease behavior |  |  | 0.845 |
| B1 | 6 | 5 |  |
| B2 | 4 | 2 |  |
| B3 | 2 | 2 |  |
| Previous surgery | 2 | 2 | 1 |
| Perianal disease | 8 | 3 | 0.198 |
| Family history of IBD | 2 | 0 | 0.486 |
| Smoking history | 6 | 3 | 0.661 |
| Treatment |  |  |  |
| Immunomodulator | 4 | 1 | 0.338 |
| History of biological treatment | 7 | 1 | 0.067 |
| CDAI | 235 (159–437) | 178 (94–336) | 0.070 |
| CRP (mg/dL) | 1.78 (0.39–10.74) | 1.76 (0.04–13.27) | 1 |
| Alb (g /dL) | 3.7 (2.7–4.1) | 3.0 (2.2–4.1) | 0.252 |
| SES-CD | 17 (9–25) | 19 (7–23) | 0.743 |

Values are presented as mean (range) or number

Abbreviations

CD: Crohn’s disease

UST: Ustekinumab

CDAI: Crohn’s disease activity index

CRP: C-reactive protein

Alb: albumin

SES-CD: simple endoscopic score for Crohn’s disease
